# Supplementary material for: Development of high barrier-coated white cardboard for fruit preservation
Source: Royal Society of Chemistry journal article supplement (doi:10.1039/d4ra01308e), 2024-01-01
Supplement: d4ra01308e1.pdf [file d4ra01308e1.pdf]

## Supporting Information

### Development of High Barrier Coated White Cardboard for Fruit Preservation

Zheng Cheng <sup>a,b,c,\*</sup>, Jialin Li <sup>a,e</sup>, Miao Su <sup>a,d</sup>, Naiyu Xiao <sup>a,b,d,\*</sup>, Le Zhong <sup>a,b,\*</sup>, Xueqin Zhang <sup>a,b,c</sup>,  
Meixian Liu <sup>a,b</sup>, Qifeng Chen <sup>c</sup>, Jinxian Zhou <sup>a,b</sup>

<sup>a</sup>College of Light Industry and Food Technology, Academy of Contemporary Agricultural Engineering Innovations, Zhongkai University of Agriculture and Engineering, Guangzhou, CN 510225, China.

<sup>b</sup>Guangdong Provincial Key Laboratory of Lingnan Specialty Food Science and Technology, Zhongkai University of Agriculture and Engineering, Guangzhou, CN 510225, China.

<sup>c</sup>State Key Laboratory of Pulp and Paper Engineering, South China University of Technology, Guangzhou, CN 510640, China.

<sup>d</sup>Research Center of Chinese Medicinal Resource Science and Engineering, Guangzhou University of Chinese Medicine, Guangzhou 510006, China.

<sup>e</sup>Engineering Research Institute, Jiangxi University of Science and Technology, Ganzhou 341000, China.

\*Corresponding author: Dr. Zheng Cheng, E-mail: chengzheng@zhku.edu.cn; Dr. Naiyu Xiao, E-mail: 1308865979@qq.com; Dr. Le Zhong, E-mail: 786583136@qq.com.

## Supplementary Results and Discussion

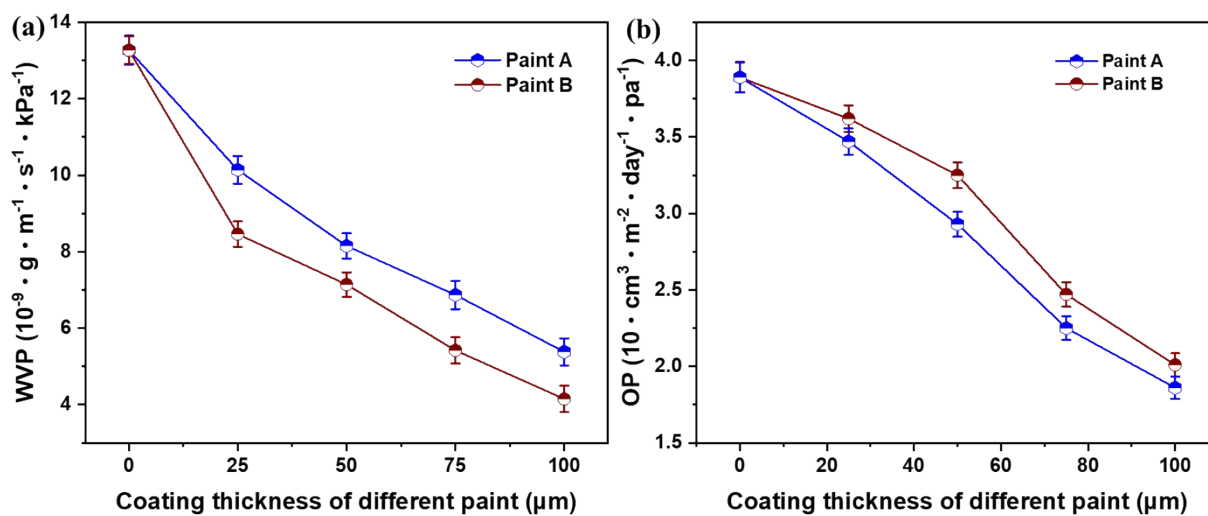

**Figure S1.** (a) Water vapor permeability of WC respectively coated by paint A or paint B with different coating thicknesses; (b) Gas permeability coefficient of WC respectively coated by paint A or paint B with different thickness.

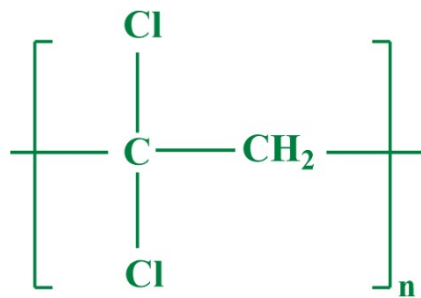

**Figure S2.** Chemical structure of PVDC.
